# Supplementary material for: Assembly of endocytic machinery around individual influenza viruses during viral entry
Source: Springer Nature journal article supplement (doi:10.1038/nsmb769), 2004-05-02
Supplement: 41594_2004_BFnsmb769_MOESM9_ESM.pdf [file 41594_2004_BFnsmb769_MOESM9_ESM.pdf]

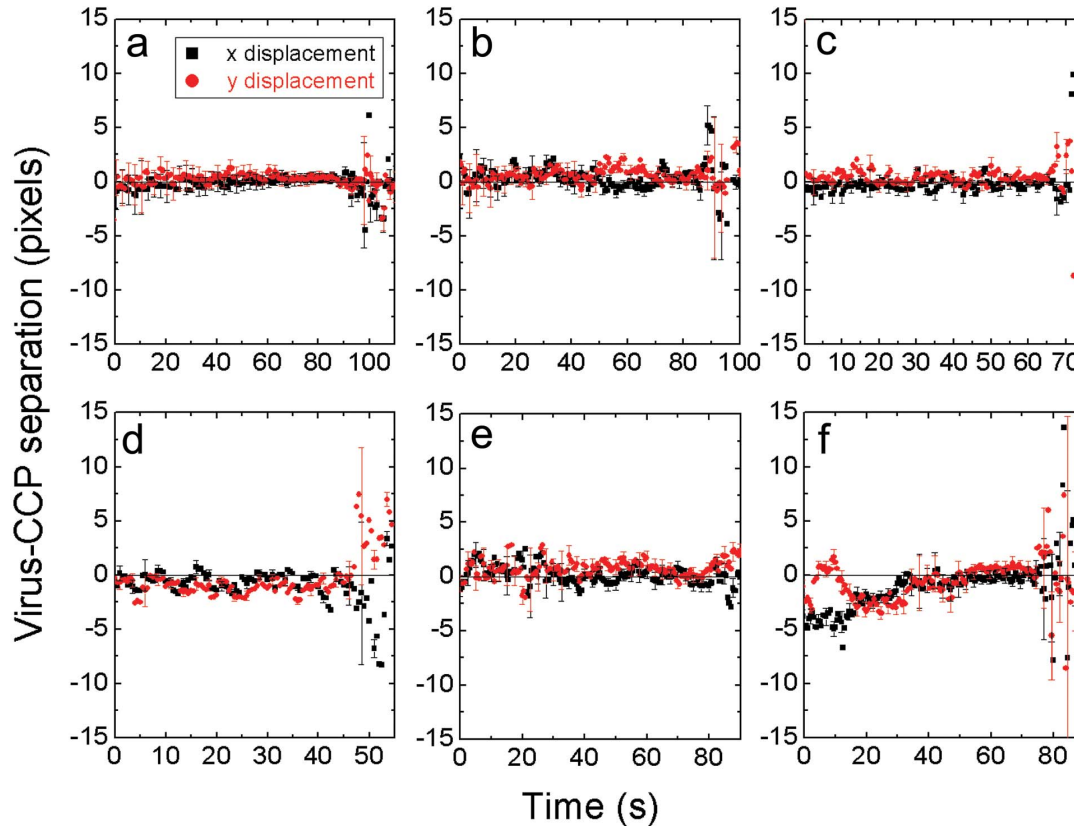

**Supplementary Figure 2.** The relative displacements of CCPs from their associated viruses. Black and red symbols are the displacements in the  $x$  and  $y$  directions in units of camera pixels (95 nm/pixel), respectively. We used least-squares fitting to determine the location of any EYFP-labeled clathrin structures near the virus prior to its stage II movement. In each frame, we considered a  $4 \mu\text{m}^2$  area centered on the virus peak. The EYFP signal in this region was fit to a Gaussian function  $I(x, y) = I_0 + Ae^{-[(x-x_0)^2+(y-y_0)^2]/2\sigma^2}$ , where  $I_0$  is the average background fluorescence level,  $A$  is the amplitude of the peak,  $x_0$  and  $y_0$  are the center coordinates, and  $\sigma$  is the width.  $I_0$ ,  $A$ ,  $x_0$ , and  $y_0$  were treated as free fitting parameters, while  $\sigma$  was fixed to be the experimentally measured width of a diffraction-limited spot. The error bars are determined from the variance matrix obtained by the least-squares fitting. Visual inspection of the movies shows that we are able to track the peak as soon as a clathrin structure discernable from the background appears in the  $4 \mu\text{m}^2$  area. In 96% of the trajectories, the clathrin peak position  $(x_0, y_0)$  starts centered on the virus to within 1 pixel, as indicated by examples shown in **a-e**. Among these, only 2% of viruses seem to land on a pre-existing CCP. The rest show the appearance of a clathrin spot after viral binding. The EYFP-clathrin intensity gradually increased and then rapidly disappeared before the virus started stage II movement. After the clathrin-structure has

disappeared, tracking is no longer possible, as indicated by the large error bars appearing at the end of the plots. In the remaining 4% of the trajectories, the initial clathrin peak position is separated from that of the virus (i.e.  $x_0 \neq 0$  and  $y_0 \neq 0$ ) and the separation in general decreases with time until the virus joins the clathrin structure, as shown in **f**. This quantitative analysis confirms the results of our visual inspection and indicates *de novo* formation of CCPs at the site of bound viruses.
