# Supplementary material for: Assembly of endocytic machinery around individual influenza viruses during viral entry
Source: Springer Nature journal article supplement (doi:10.1038/nsmb769), 2004-05-02
Supplement: 41594_2004_BFnsmb769_MOESM11_ESM.pdf [file 41594_2004_BFnsmb769_MOESM11_ESM.pdf]

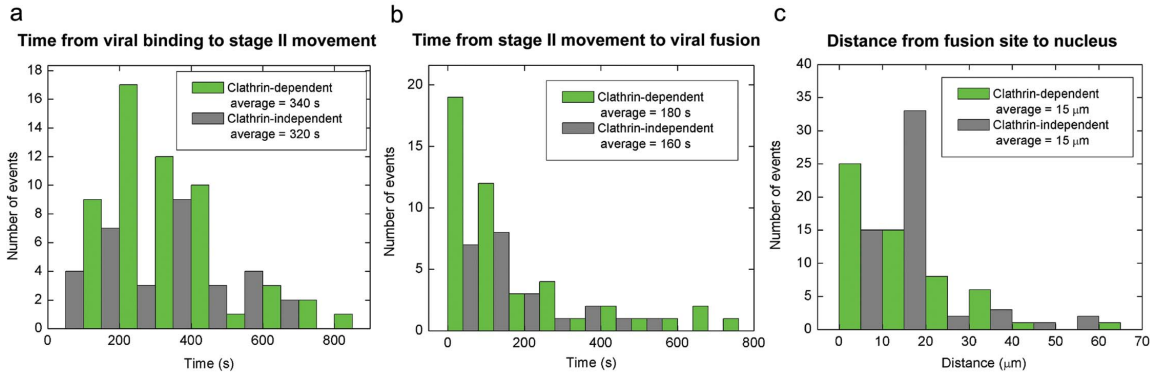

**Supplementary Figure 4.** Histograms of the time between viral binding and stage II movement (**a**), the time between stage II movement and viral fusion (**b**), and the distance between the fusion site and the nuclear envelope (**c**) for viruses that enter via clathrin-dependent and -independent endocytosis.
